# Supplementary material for: Factors for the Early Revision of Misdiagnosed Tuberculosis to Lung Cancer: A Multicenter Study in A Tuberculosis-Prevalent Area
Source: PubMed Central journal article supplement (PMC6571679; doi:10.3390/jcm8050700), 2019-05-17
Supplement: jcm-08-00700-s001.pdf [file jcm-08-00700-s001.pdf]

**Table S1.** The demographics of patients according to the timing to obtain pathology proof.

|                            | <b>Early Obtain<br/>Pathology<br/>(n = 26)</b> | <b>Late Obtain<br/>Pathology<br/>(n = 19)</b> | <b>p Value</b> |
|----------------------------|------------------------------------------------|-----------------------------------------------|----------------|
| Age, year                  | 65.6±13.6                                      | 66.7±13.2                                     | 0.748          |
| Male sex                   | 19 (73%)                                       | 16 (68%)                                      | 0.734          |
| Microbiology               |                                                |                                               |                |
| AFS *                      |                                                |                                               | 0.686          |
| positive                   | 5 (19%)                                        | 4 (21%)                                       |                |
| negative                   | 20 (77%)                                       | 15 (79%)                                      |                |
| Culture *                  |                                                |                                               | 0.114          |
| NTM                        | 2 (8%)                                         | 6 (32%)                                       |                |
| negative                   | 10 (39%)                                       | 6 (32%)                                       |                |
| Radiographic pattern       |                                                |                                               | 0.959          |
| nodular                    | 16 (62%)                                       | 12 (63%)                                      |                |
| consolidation              | 9 (34%)                                        | 6 (32%)                                       |                |
| pleural effusion           | 1 (4%)                                         | 1 (5%)                                        |                |
| Lesion size, cm            | 5.8±2.8                                        | 2.7±1.1                                       | <0.001         |
| Bilateral                  | 5 (19%)                                        | 1 (5%)                                        | 0.081          |
| Cavitation                 | 5 (19%)                                        | 5 (26%)                                       | 0.572          |
| Miliary pattern            | 5 (19%)                                        | 0                                             | 0.043          |
| Pleural effusion amount    |                                                |                                               | 0.303          |
| <1/3 hemithorax            | 3 (12%)                                        | 0                                             |                |
| 1/3-2/3 hemithorax         | 3 (12%)                                        | 2 (11%)                                       |                |
| >2/3 hemithorax            | 0                                              | 1 (5%)                                        |                |
| The cause for TB suspicion |                                                |                                               | 0.626          |
| AFS (+)                    | 5 (19%)                                        | 7 (37%)                                       |                |
| Pathology suspicion        | 1 (4%)                                         | 1 (5%)                                        |                |
| Radiological suspicion     | 15 (58%)                                       | 8 (42%)                                       |                |
| Clinical suspicion         | 5 (19%)                                        | 3 (16%)                                       |                |
| Anti-TB treatment          | 18 (69%)                                       | 19 (100%)                                     | 0.008          |
| Days to diagnosis revision | 42.2±37.3                                      | 78.6±46.4                                     | 0.006          |
| Days to pathology obtained | 9.8±10.7                                       | 111.9±83.7                                    | <0.001         |

Abbreviation: AFS, acid-fast smear; TB, tuberculosis; NTM, nontuberculous mycobacteria; \* One case and 21 cases did not have examinations for AFS and mycobacteria culture, respectively.

**Study Period:**

The cases screening period:

National Taiwan University Hospital, Taipei: Jan 2009 – June 2018

National Taiwan University Hospital, Yun-Lin Branch: Jan 2014 – Dec 2018

National Yang-Ming University Hospital: Jan 2007 – Dec 2018

Far Eastern Memorial Hospital: Jan 2007 – Dec 2018

E-Da Hospital: Jan 2014 – Dec 2018
